# Supplementary material for: Performance Evaluation of the Quantamatrix QMAC-dRAST System for Rapid Antibiotic Susceptibility Testing Directly from Blood Cultures
Source: Microorganisms. 2022 Jun 14;10(6):1212. doi: 10.3390/microorganisms10061212 (PMC9229829; doi:10.3390/microorganisms10061212)
Supplement: Supplementary file 1 [file microorganisms-10-01212-s001.zip › microorganisms-1779733-supplementary.pdf]

**Table S1: List of antibiotics tested for each bacterial group included in the study.**

| <b>Enterobacterales</b>       | <b>Non-fermentative GNB</b>   | <b><i>Staphylococcus spp.</i></b> | <b><i>Enterococcus spp.</i></b> |
|-------------------------------|-------------------------------|-----------------------------------|---------------------------------|
| Amikacin                      | Amikacin                      | Clindamycin                       | Ampicillin                      |
| Amoxicillin-Clavulanate       | Ceftazidime                   | Daptomycin                        | Gentamicin-Syn                  |
| Ampicillin                    | Ceftazidime-Avibactam         | Gentamicin                        | Linezolid                       |
| Ceftazidime                   | Ciprofloxacin                 | Linezolid                         | Levofloxacin                    |
| Ceftazidime-Avibactam         | Cefepime                      | Levofloxacin                      | Teicoplanin                     |
| Ciprofloxacin                 | Gentamicin*                   | Oxacillin                         | Vancomycin                      |
| Cefepime                      | Imipenem                      | Penicillin G                      | Erythromycin**                  |
| Gentamicin                    | Levofloxacin                  | Teicoplanin                       | Tetracyclin**                   |
| Imipenem                      | Meropenem                     | Vancomycin                        | Streptomycin high**a            |
| Levofloxacin                  | Piperacillin -Tazobactam      | Rifampicin**                      |                                 |
| Meropenem                     | Trimethoprim-Sulfamethoxazole | Erythromycin**                    |                                 |
| Piperacillin-Tazobactam       | Piperacillin**                | Tetracyclin**                     |                                 |
| Trimethoprim-Sulfamethoxazole | Colistin**                    |                                   |                                 |
| Piperacillin**                | Cefotaxime**a                 |                                   |                                 |
| Tetracyclin**                 |                               |                                   |                                 |
| Colistin**                    |                               |                                   |                                 |
| Cefotaxime**a                 |                               |                                   |                                 |

GNB: Gram-negative bacteria.

\* Antibiotic analyzed only in the QMAC-dRAST performance study. \*\* Antibiotic analyzed only in the repeatability and reproducibility studies. <sup>a</sup> antibiotics not tested on the Phoenix™ M50.

**Table S2: Distribution of amikacin MICs obtained with the QMAC-dRAST versus the reference methods for gram-negative bacteria.**

|            |           | Reference MICs |    |    |           |
|------------|-----------|----------------|----|----|-----------|
|            |           | $\leq 4$       | 8  | 16 | $\geq 32$ |
| dRAST MICs | $\leq 4$  | 136            | 10 | 0  | 0         |
|            | 8         | 0              | 0  | 0  | 0         |
|            | 16        | 0              | 0  | 0  | 0         |
|            | $\geq 32$ | 0              | 0  | 1  | 3         |

The reference method corresponds to the MICs measured with the Phoenix™ M50 or by gradient strip method.

**Table S3: Distribution of ampicillin MICs obtained with the QMAC-dRAST versus the reference methods for gram-negative bacteria.**

|            |           | Reference MICs |   |   |           |
|------------|-----------|----------------|---|---|-----------|
|            |           | $\leq 2$       | 4 | 8 | $\geq 16$ |
| dRAST MICs | $\leq 4$  | 13             | 1 | 0 | 0         |
|            | 8         | 1              | 1 | 0 | 0         |
|            | $\geq 16$ | 0              | 2 | 4 | 109       |

The reference method corresponds to the MICs measured with the Phoenix™ M50 or by gradient strip method.

**Table S4: Distribution of amoxicillin-clavulanate MICs obtained with the QMAC-dRAST versus the reference methods for gram-negative bacteria.**

|            |           | Reference MICs |    |   |    |    |           |
|------------|-----------|----------------|----|---|----|----|-----------|
|            |           | $\leq 2$       | 4  | 8 | 16 | 32 | $\geq 64$ |
| dRAST MICs | $\leq 4$  | 26             | 10 | 2 | 0  | 0  | 0         |
|            | 8         | 0              | 5  | 5 | 2  | 0  | 0         |
|            | 16        | 0              | 0  | 1 | 8  | 0  | 1         |
|            | $\geq 32$ | 2              | 0  | 0 | 3  | 5  | 61        |

The reference method corresponds to the MICs measured with the Phoenix™ M50 or by gradient strip method.

**Table S5: Distribution of cefepime MICs obtained with the QMAC-dRAST versus the reference methods for gram-negative bacteria.**

|            |      | Reference MICs |        |       |      |   |   |   |    |      |
|------------|------|----------------|--------|-------|------|---|---|---|----|------|
|            |      | 0.03125*       | 0.0625 | 0.125 | ≤ 1* | 2 | 4 | 8 | 16 | ≥ 32 |
| dRAST MICs | ≤ 1  | 0              | 0      | 0     | 88   | 0 | 0 | 0 | 0  | 0    |
|            | 2    | 0              | 0      | 0     | 5    | 5 | 1 | 0 | 0  | 0    |
|            | 4    | 0              | 0      | 0     | 2    | 1 | 4 | 1 | 0  | 0    |
|            | 8    | 1              | 0      | 1     | 0    | 0 | 1 | 2 | 2  | 7    |
|            | 16   | 0              | 0      | 0     | 0    | 0 | 0 | 1 | 1  | 3    |
|            | ≥ 32 | 0              | 0      | 3     | 1    | 0 | 1 | 0 | 0  | 13   |

The reference method corresponds to the MICs measured with the Phoenix™ M50 or by gradient strip method. \*Different lower MIC thresholds are provided by the Phoenix™ M50 according to the bacterial species.

**Table S6: Distribution of ceftazidime MICs obtained with the QMAC-dRAST versus the reference methods for gram-negative bacteria.**

|            |       | Reference MICs |        |      |   |   |   |      |
|------------|-------|----------------|--------|------|---|---|---|------|
|            |       | 0.25*          | ≤ 0.5* | ≤ 1* | 2 | 4 | 8 | ≥ 16 |
| dRAST MICs | ≤ 0.5 | 1              | 65     | 1    | 0 | 0 | 0 | 0    |
|            | 1     | 1              | 6      | 2    | 0 | 1 | 0 | 0    |
|            | 2     | 0              | 0      | 5    | 4 | 2 | 1 | 1    |
|            | 4     | 0              | 2      | 0    | 5 | 2 | 0 | 0    |
|            | 8     | 0              | 1      | 0    | 0 | 3 | 1 | 2    |
|            | 16    | 0              | 0      | 0    | 0 | 0 | 0 | 7    |
|            | 32    | 1              | 1      | 0    | 0 | 0 | 1 | 9    |
|            | ≥ 64  | 0              | 2      | 0    | 1 | 0 | 0 | 16   |

The reference method corresponds to the MICs measured with the Phoenix™ M50 or by gradient strip method. \*Different lower MIC thresholds are provided by the Phoenix™ M50 according to the bacterial species.

**Table S7: Distribution of ceftazidime-avibactam MICs obtained with the QMAC-dRAST versus the reference methods for gram-negative bacteria.**

|            |      | Reference MICs |       |      |     |    |   |   |   |      |
|------------|------|----------------|-------|------|-----|----|---|---|---|------|
|            |      | ≤ 0.0625       | 0.125 | 0.25 | 0.5 | 1  | 2 | 4 | 8 | ≥ 16 |
| dRAST MICs | ≤ 4  | 2              | 0     | 81   | 28  | 14 | 9 | 0 | 0 | 0    |
|            | 8    | 0              | 0     | 1    | 0   | 0  | 1 | 2 | 1 | 0    |
|            | ≥ 16 | 0              | 0     | 0    | 0   | 0  | 0 | 0 | 0 | 3    |

The reference method corresponds to the MICs measured with the Phoenix™ M50 or by gradient strip method.

**Table S8: Distribution of ciprofloxacin MICs obtained with the QMAC-dRAST versus the reference methods for gram-negative bacteria.**

|            |          | Reference MICs |         |           |          |         |     |   |     |
|------------|----------|----------------|---------|-----------|----------|---------|-----|---|-----|
|            |          | 0.015625*      | 0.03125 | ≤ 0.0625* | ≤ 0.125* | ≤ 0.25* | 0.5 | 1 | ≥ 2 |
| dRAST MICs | ≤ 0.0625 | 0              | 0       | 1         | 87       | 2       | 0   | 0 | 0   |
|            | 0.125    | 0              | 0       | 0         | 9        | 2       | 0   | 0 | 0   |
|            | 0.25     | 0              | 0       | 0         | 1        | 2       | 2   | 0 | 0   |
|            | 0.5      | 0              | 0       | 0         | 0        | 1       | 7   | 0 | 0   |
|            | 1        | 0              | 0       | 0         | 0        | 0       | 2   | 4 | 2   |
|            | 2        | 0              | 0       | 0         | 0        | 0       | 0   | 4 | 5   |
|            | ≥ 4      | 1              | 0       | 0         | 0        | 0       | 0   | 0 | 16  |

The reference method corresponds to the MICs measured with the Phoenix™ M50 or by gradient strip method. \*Different lower MIC thresholds are provided by the Phoenix™ M50 according to the bacterial species.

**Table S9: Distribution of gentamicin MICs obtained with the QMAC-dRAST versus the reference methods for gram-negative bacteria.**

|            |     | Reference MICs |    |   |     |
|------------|-----|----------------|----|---|-----|
|            |     | ≤ 1            | 2  | 4 | ≥ 8 |
| dRAST MICs | ≤ 1 | 82             | 33 | 5 | 0   |
|            | 2   | 0              | 1  | 1 | 1   |
|            | 4   | 0              | 0  | 2 | 0   |
|            | ≥ 8 | 0              | 0  | 0 | 24  |

The reference method corresponds to the MICs measured with the Phoenix™ M50 or by gradient strip method.

**Table S10: Distribution of imipenem MICs obtained with the QMAC-dRAST versus the reference methods for gram-negative bacteria.**

|            |         | Reference MICs |     |    |   |   |   |      |
|------------|---------|----------------|-----|----|---|---|---|------|
|            |         | ≤ 0.25         | 0.5 | 1  | 2 | 4 | 8 | ≥ 16 |
| dRAST MICs | ≤ 0.125 | 22             | 3   | 2  | 0 | 0 | 1 | 0    |
|            | 0.25    | 23             | 8   | 3  | 0 | 1 | 0 | 0    |
|            | 0.5     | 8              | 4   | 11 | 1 | 3 | 0 | 0    |
|            | 1       | 1              | 2   | 6  | 7 | 0 | 0 | 0    |
|            | 2       | 0              | 0   | 0  | 3 | 4 | 0 | 0    |
|            | 4       | 0              | 0   | 5  | 0 | 4 | 0 | 0    |
|            | 8       | 0              | 0   | 0  | 1 | 5 | 1 | 2    |
|            | 16      | 0              | 0   | 0  | 0 | 0 | 0 | 1    |
|            | ≥ 32    | 0              | 0   | 0  | 0 | 0 | 0 | 6    |

The reference method corresponds to the MICs measured with the Phoenix™ M50 or by gradient strip method.

**Table S11: Distribution of levofloxacin MICs obtained with the QMAC-dRAST versus the reference methods for gram-negative bacteria.**

|            |        | Reference MICs |    |   |     |
|------------|--------|----------------|----|---|-----|
|            |        | ≤ 0.5          | 1  | 2 | ≥ 4 |
| dRAST MICs | ≤ 0.25 | 102            | 2  | 0 | 0   |
|            | 0.5    | 5              | 12 | 0 | 0   |
|            | 1      | 1              | 4  | 3 | 0   |
|            | 2      | 0              | 0  | 3 | 2   |
|            | 4      | 0              | 0  | 0 | 2   |
|            | ≥ 8    | 0              | 0  | 0 | 14  |

The reference method corresponds to the MICs measured with the Phoenix™ M50 or by gradient strip method.

**Table S12: Distribution of meropenem MICs obtained with the QMAC-dRAST versus the reference methods for gram-negative bacteria.**

|            |         | Reference MICs |          |      |        |   |   |   |   |      |
|------------|---------|----------------|----------|------|--------|---|---|---|---|------|
|            |         | 0.0625*        | ≤ 0.125* | 0.25 | ≤ 0.5* | 1 | 2 | 4 | 8 | ≥ 16 |
| dRAST MICs | ≤ 0.125 | 1              | 97       | 10   | 8      | 2 | 0 | 0 | 0 | 0    |
|            | 0.25    | 0              | 1        | 2    | 3      | 1 | 1 | 0 | 0 | 0    |
|            | 0.5     | 0              | 2        | 0    | 4      | 0 | 5 | 0 | 1 | 0    |
|            | 1       | 0              | 1        | 0    | 0      | 0 | 1 | 0 | 0 | 0    |
|            | 2       | 0              | 0        | 0    | 0      | 0 | 1 | 0 | 1 | 0    |
|            | 4       | 0              | 0        | 0    | 0      | 0 | 0 | 0 | 1 | 0    |
|            | 8       | 0              | 0        | 0    | 0      | 0 | 0 | 0 | 0 | 0    |
|            | 16      | 0              | 0        | 0    | 0      | 0 | 0 | 0 | 0 | 0    |
|            | ≥ 32    | 0              | 0        | 0    | 1      | 0 | 0 | 0 | 0 | 6    |

The reference method corresponds to the MICs measured with the Phoenix™ M50 or by gradient strip method. \*Different lower MIC thresholds are provided by the Phoenix™ M50 according to the bacterial species.

**Table S13: Distribution of piperacillin-tazobactam MICs obtained with the QMAC-dRAST versus the reference methods for gram-negative bacteria.**

|            |       | Reference MICs |   |      |   |    |       |    |        |        |
|------------|-------|----------------|---|------|---|----|-------|----|--------|--------|
|            |       | 1*             | 2 | ≤ 4* | 8 | 16 | ≥ 32* | 64 | ≥ 128* | ≥ 256* |
| dRAST MICs | ≤ 8   | 0              | 0 | 96   | 2 | 1  | 0     | 0  | 0      | 1      |
|            | 16    | 0              | 0 | 0    | 3 | 5  | 1     | 0  | 0      | 0      |
|            | 32    | 0              | 0 | 0    | 1 | 2  | 2     | 1  | 2      | 0      |
|            | 64    | 0              | 0 | 0    | 0 | 0  | 1     | 1  | 2      | 0      |
|            | ≥ 128 | 1              | 0 | 0    | 1 | 0  | 0     | 0  | 21     | 0      |

The reference method corresponds to the MICs measured with the Phoenix™ M50 or by gradient strip method. \*Different lower or upper MIC thresholds are provided by the Phoenix™ M50 according to the bacterial species.

**Table S14: Distribution of ampicillin MICs obtained with the QMAC-dRAST versus the reference methods for gram-positive bacteria.**

|            |      | Reference MICs |        |        |   |      |
|------------|------|----------------|--------|--------|---|------|
|            |      | 0.5*           | ≤ 1.0* | ≤ 2.0* | 4 | ≥ 32 |
| dRAST MICs | ≤ 2  | 0              | 10     | 7      | 0 | 0    |
|            | 4    | 0              | 3      | 0      | 0 | 0    |
|            | 8    | 0              | 1      | 2      | 0 | 0    |
|            | ≥ 16 | 1              | 0      | 0      | 1 | 6    |

The reference method corresponds to the MICs measured with the Phoenix™ M50 or by gradient strip method. \*Different lower MIC thresholds are provided by the Phoenix™ M50 according to the bacterial species.

**Table S15: Distribution of clindamycin MICs obtained with the QMAC-dRAST versus the reference methods for gram-positive bacteria.**

|            |         | Reference MICs |         |     |   |     |
|------------|---------|----------------|---------|-----|---|-----|
|            |         | 0.125*         | ≤ 0.25* | 0.5 | 1 | ≥ 2 |
| dRAST MICs | ≤ 0.125 | 1              | 55      | 1   | 0 | 0   |
|            | 1       | 0              | 0       | 0   | 0 | 1   |
|            | ≥ 2     | 0              | 1       | 0   | 0 | 10  |

The reference method corresponds to the MICs measured with the Phoenix™ M50 or by gradient strip method. \*Different lower or upper MIC thresholds are provided by the Phoenix™ M50 according to the bacterial species.

**Table S16: Distribution of daptomycin MICs obtained with the QMAC-dRAST versus the reference methods for gram-positive bacteria.**

|            |          | Reference MICs |     |   |
|------------|----------|----------------|-----|---|
|            |          | ≤ 0.25         | 0.5 | 1 |
| dRAST MICs | ≤ 0.0625 | 1              | 0   | 0 |
|            | 0.125    | 0              | 0   | 0 |
|            | 0.25     | 9              | 5   | 0 |
|            | 0.5      | 12             | 27  | 1 |
|            | 1        | 1              | 10  | 2 |
|            | 2        | 0              | 0   | 0 |
|            | 4        | 0              | 0   | 0 |
|            | ≥ 8      | 0              | 1   | 0 |

The reference method corresponds to the MICs measured with the Phoenix™ M50 or by gradient strip method.

**Table S17: Distribution of gentamicin MICs obtained with the QMAC-dRAST versus the reference methods for gram-positive bacteria.**

|            |         | Reference MICs |   |   |    |    |      |
|------------|---------|----------------|---|---|----|----|------|
|            |         | ≤ 1.0          | 2 | 4 | 8  | 16 | ≥ 32 |
| dRAST MICs | ≤ 0.125 | 28             | 0 | 0 | 0  | 0  | 0    |
|            | 0.25    | 17             | 0 | 0 | 0  | 0  | 0    |
|            | 0.5     | 5              | 0 | 0 | 0  | 0  | 0    |
|            | 1       | 0              | 0 | 1 | 0  | 0  | 0    |
|            | 2       | 1              | 0 | 0 | 2  | 0  | 0    |
|            | ≥ 4     | 0              | 0 | 0 | 14 | 0  | 1    |

The reference method corresponds to the MICs measured with the Phoenix™ M50 or by gradient strip method.

**Table S18: Distribution of gentamicin-high MICs obtained with the QMAC-dRAST versus the reference methods for gram-positive bacteria.**

|            |       | Reference MICs |        |        |
|------------|-------|----------------|--------|--------|
|            |       | 64*            | ≤ 512* | ≥ 1024 |
| dRAST MICs | ≤ 128 | 0              | 26     | 0      |
|            | ≥ 256 | 1              | 0      | 4      |

The reference method corresponds to the MICs measured with the Phoenix™ M50 or by gradient strip method. \*Different lower or upper MIC thresholds are provided by the Phoenix™ M50 according to the bacterial species.

**Table S19: Distribution of levofloxacin MICs obtained with the QMAC-dRAST versus the reference methods for gram-positive bacteria.**

|            |         | Reference MICs |      |        |   |   |   |     |
|------------|---------|----------------|------|--------|---|---|---|-----|
|            |         | 0.125*         | 0.25 | ≤ 0.5* | 1 | 2 | 4 | ≥ 8 |
| dRAST MICs | ≤ 0.125 | 0              | 0    | 10     | 0 | 0 | 0 | 0   |
|            | 0.25    | 0              | 0    | 20     | 0 | 0 | 0 | 0   |
|            | 0.5     | 0              | 0    | 9      | 1 | 0 | 0 | 0   |
|            | 1       | 0              | 0    | 9      | 4 | 0 | 1 | 0   |
|            | 2       | 0              | 0    | 2      | 1 | 2 | 1 | 0   |
|            | 4       | 0              | 0    | 1      | 0 | 1 | 0 | 1   |
|            | 8       | 0              | 0    | 1      | 0 | 1 | 2 | 6   |
|            | ≥ 16    | 3              | 0    | 1      | 1 | 1 | 1 | 15  |

The reference method corresponds to the MICs measured with the Phoenix™ M50 or by gradient strip method. \*Different lower or upper MIC thresholds are provided by the Phoenix™ M50 according to the bacterial species.

**Table S20: Distribution of linezolid MICs obtained with the QMAC-dRAST versus the reference methods for gram-positive bacteria.**

|            |       | Reference MICs |    |   |     |
|------------|-------|----------------|----|---|-----|
|            |       | 1              | 2  | 4 | ≥ 8 |
| dRAST MICs | ≤ 0.5 | 23             | 28 | 0 | 0   |
|            | 1     | 24             | 19 | 5 | 1   |

The reference method corresponds to the MICs measured with the Phoenix™ M50 or by gradient strip method.

**Table S21: Distribution of oxacillin MICs obtained with the QMAC-dRAST versus the reference methods for gram-positive bacteria.**

|            |        | Reference MICs |     |   |   |     |
|------------|--------|----------------|-----|---|---|-----|
|            |        | ≤ 0.25         | 0.5 | 1 | 2 | ≥ 4 |
| dRAST MICs | ≤ 0.25 | 1              | 0   | 0 | 0 | 0   |
|            | 0.5    | 22             | 1   | 0 | 0 | 2   |
|            | 1      | 2              | 3   | 2 | 3 | 4   |
|            | 2      | 0              | 0   | 1 | 1 | 5   |
|            | ≥ 4    | 0              | 0   | 1 | 1 | 20  |

The reference method corresponds to the MICs measured with the Phoenix™ M50 or by gradient strip method.

**Table S22: Distribution of penicillin G MICs obtained with the QMAC-dRAST versus the reference methods for gram-positive bacteria.**

|            |       | Reference MICs |      |      |       |
|------------|-------|----------------|------|------|-------|
|            |       | ≤ 0.0625       | 0.01 | 0.25 | ≥ 0.5 |
| dRAST MICs | 0.125 | 1              | 0    | 0    | 0     |
|            | 0.25  | 0              | 0    | 1    | 0     |
|            | ≥ 1   | 0              | 0    | 1    | 21    |

The reference method corresponds to the MICs measured with the Phoenix™ M50 or by gradient strip method.

**Table S23: Distribution of teicoplanin MICs obtained with the QMAC-dRAST versus the reference methods for gram-positive bacteria.**

|            |              | Reference MICs |   |            |   |   |             |     |
|------------|--------------|----------------|---|------------|---|---|-------------|-----|
|            |              | $\leq 0.5^*$   | 1 | $\leq 2^*$ | 4 | 8 | $\geq 16^*$ | 32* |
| dRAST MICs | $\leq 0.125$ | 1              | 0 | 0          | 0 | 0 | 0           | 0   |
|            | 0.25         | 2              | 0 | 0          | 0 | 0 | 0           | 0   |
|            | 0.5          | 40             | 0 | 0          | 0 | 0 | 0           | 0   |
|            | 1            | 24             | 2 | 2          | 0 | 0 | 0           | 0   |
|            | 2            | 1              | 0 | 10         | 2 | 0 | 0           | 0   |
|            | 4            | 0              | 0 | 4          | 0 | 0 | 0           | 0   |
|            | 8            | 0              | 0 | 0          | 1 | 0 | 3           | 0   |
|            | $\geq 16$    | 0              | 0 | 0          | 0 | 0 | 7           | 1   |

The reference method corresponds to the MICs measured with the Phoenix™ M50 or by gradient strip method. \*Different lower or upper MIC thresholds are provided by the Phoenix™ M50 according to the bacterial species.

**Table S24: Distribution of tetracyclin MICs obtained with the QMAC-dRAST versus the reference methods for gram-positive bacteria.**

|            |            | Reference MICs |   |   |          |
|------------|------------|----------------|---|---|----------|
|            |            | $\leq 0.5$     | 1 | 2 | $\geq 4$ |
| dRAST MICs | $\leq 0.5$ | 46             | 2 | 1 | 2        |
|            | 1          | 0              | 1 | 4 | 2        |
|            | 2          | 1              | 1 | 0 | 0        |
|            | 4          | 0              | 0 | 0 | 0        |
|            | $\geq 8$   | 0              | 0 | 0 | 9        |

The reference method corresponds to the MICs measured with the Phoenix™ M50 or by gradient strip method.

**Table S25: Distribution of vancomycin MICs obtained with the QMAC-dRAST versus the reference methods for gram-positive bacteria.**

|            |             | Reference MICs |    |    |   |   |             |    |    |     |     |              |
|------------|-------------|----------------|----|----|---|---|-------------|----|----|-----|-----|--------------|
|            |             | $\leq 0.5$     | 1  | 2  | 4 | 8 | $\geq 16^*$ | 32 | 64 | 128 | 256 | $\geq 512^*$ |
| dRAST MICs | $\leq 0.25$ | 3              | 0  | 1  | 0 | 0 | 0           | 0  | 0  | 0   | 0   | 0            |
|            | 0.5         | 12             | 16 | 0  | 1 | 0 | 0           | 0  | 0  | 0   | 0   | 0            |
|            | 1           | 9              | 29 | 1  | 0 | 0 | 0           | 0  | 0  | 0   | 0   | 0            |
|            | 2           | 0              | 4  | 11 | 1 | 0 | 0           | 0  | 0  | 0   | 0   | 0            |
|            | 4           | 0              | 0  | 0  | 1 | 0 | 0           | 0  | 0  | 0   | 0   | 0            |
|            | 8           | 0              | 1  | 0  | 0 | 1 | 1           | 0  | 0  | 0   | 0   | 0            |
|            | 16          | 0              | 0  | 0  | 0 | 0 | 0           | 0  | 0  | 0   | 0   | 0            |
|            | $\geq 32$   | 0              | 0  | 0  | 0 | 0 | 7           | 0  | 0  | 0   | 0   | 1            |

The reference method corresponds to the MICs measured with the Phoenix™ M50 or by gradient strip method. \*Different upper MIC thresholds are provided by the Phoenix™ M50 according to the bacterial species.

**Table S26: Analysis of QMAC-dRast results for each bacterial species.**

| Bacterial species                   | N° of antibiotics tested | CA   | CA % | me | me%  | ME | ME% S | VME | VME %R | S_ % |
|-------------------------------------|--------------------------|------|------|----|------|----|-------|-----|--------|------|
| <b>Enterobacterales, total</b>      | 1676                     | 1594 | 95.1 | 61 | 3.6  | 17 | 1.4   | 4   | 1.1    | 77.3 |
| <i>Escherichia coli</i>             | 402                      | 386  | 96   | 14 | 3.5  | 2  | 0.7   |     |        | 74.6 |
| <i>Klebsiella pneumoniae</i>        | 272                      | 263  | 96.7 | 8  | 2.9  |    |       | 1   | 1.2    | 68.8 |
| <i>Enterobacter cloacae</i>         | 182                      | 178  | 97.8 | 3  | 1.6  |    |       | 1   | 1.6    | 64.8 |
| <i>Proteus mirabilis</i>            | 132                      | 120  | 90.9 | 7  | 5.3  | 4  | 3.8   | 1   | 4.8    | 84.1 |
| <i>Klebsiella aerogenes</i>         | 130                      | 129  | 99.2 | 1  | 0.8  |    |       |     |        | 77.7 |
| <i>Klebsiella oxytoca</i>           | 130                      | 123  | 94.6 | 6  | 4.6  | 1  | 1     |     |        | 81.5 |
| <i>Serratia marcescens</i>          | 130                      | 115  | 88.5 | 9  | 6.9  | 6  | 5.6   |     |        | 83.1 |
| <i>Proteus spp.</i>                 | 142                      | 132  | 93   | 7  | 4.9  | 2  | 1.7   | 1   | 8.3    | 91.5 |
| <i>Citrobacter freundii</i>         | 52                       | 51   | 98.1 | 1  | 1.9  |    |       |     |        | 86.5 |
| <i>Morganella morganii</i>          | 52                       | 48   | 92.3 | 2  | 3.8  | 2  | 5.4   |     |        | 78.8 |
| <i>Citrobacter koseri</i>           | 39                       | 36   | 92.3 | 3  | 7.7  |    |       |     |        | 92.3 |
| <i>Salmonella spp.</i>              | 13                       | 13   | 100  |    |      |    |       |     |        | 100  |
| <b>Non-fermentative GNB, total</b>  | 171                      | 156  | 91.2 | 8  | 4.7  | 5  | 4.4   | 2   | 4      | 70.8 |
| <i>Pseudomonas aeruginosa</i>       | 128                      | 119  | 93   | 3  | 2.3  | 4  | 4.4   | 2   | 5.7    | 72.7 |
| <i>Acinetobacter baumannii</i>      | 35                       | 30   | 85.7 | 4  | 11.4 | 1  | 5.6   |     |        | 62.9 |
| <i>Acinetobacter spp.</i>           | 7                        | 6    | 85.7 | 1  | 14.3 |    |       |     |        | 71.4 |
| <i>Stenotrophomonas maltophilia</i> | 1                        | 1    | 100  |    |      |    |       |     |        | 100  |
| <b>Staphylococcus, total</b>        | 576                      | 538  | 93.4 | 2  | 0.3  | 28 | 6.1   | 8   | 7.0    | 79.9 |
| <i>Staphylococcus aureus</i>        | 216                      | 205  | 94.9 |    |      | 4  | 2.4   | 7   | 14.6   | 77.8 |
| <i>Staphylococcus epidermidis</i>   | 152                      | 144  | 94.7 |    |      | 8  | 7.5   |     |        | 70.4 |
| <i>Staphylococcus hominis</i>       | 72                       | 65   | 90.3 |    |      | 6  | 9.4   | 1   | 12.5   | 88.9 |
| <i>Staphylococcus capitis</i>       | 56                       | 50   | 89.3 |    |      | 6  | 11.5  |     |        | 92.9 |
| <i>Staphylococcus haemolyticus</i>  | 40                       | 36   | 90   | 1  | 2.5  | 3  | 9.7   |     |        | 80   |
| <i>Staphylococcus lugdunensis</i>   | 40                       | 38   | 95   | 1  | 2.5  | 1  | 2.6   |     |        | 97.5 |
| <b>Enterococcus, total</b>          | 181                      | 171  | 94.5 | 3  | 1.7  | 6  | 4.1   | 1   | 2.8    | 80.1 |
| <i>Enterococcus faecium</i>         | 83                       | 75   | 90.4 | 3  | 3.6  | 4  | 7.4   | 1   | 3.4    | 65.1 |
| <i>Enterococcus faecalis</i>        | 78                       | 77   | 98.7 |    |      | 1  | 1.4   |     |        | 93.6 |
| <i>Enterococcus casseliflavus</i>   | 15                       | 14   | 93.3 |    |      | 1  | 7.1   |     |        | 93.3 |
| <i>Enterococcus gallinarum</i>      | 5                        | 5    | 100  |    |      |    |       |     |        | 80   |
| <b>TOTAL</b>                        | 2604                     | 2459 | 94.4 | 74 | 2.8  | 56 | 2.9   | 15  | 2.6    | 77.7 |

GNB: gram negative bacteria, N°: number, CA: categorical agreement, me: minor error, ME: major error, ME%S: percentage of major error divided by the number of susceptible strains, VME: very major error, VME%R: percentage of very major error divided by the number of resistant strains, S\_ %: percentage of antibiotics which exhibit cmi values interpreted as S or I.
